# Supplementary material for: Molecular Binding Mechanism of TtgR Repressor to Antibiotics and Antimicrobials
Source: PubMed Central journal article supplement (PMC4589371; doi:10.1371/journal.pone.0138469), 2015-09-30
Supplement: pone.0138469.s001.pdf [file pone.0138469.s001.pdf]

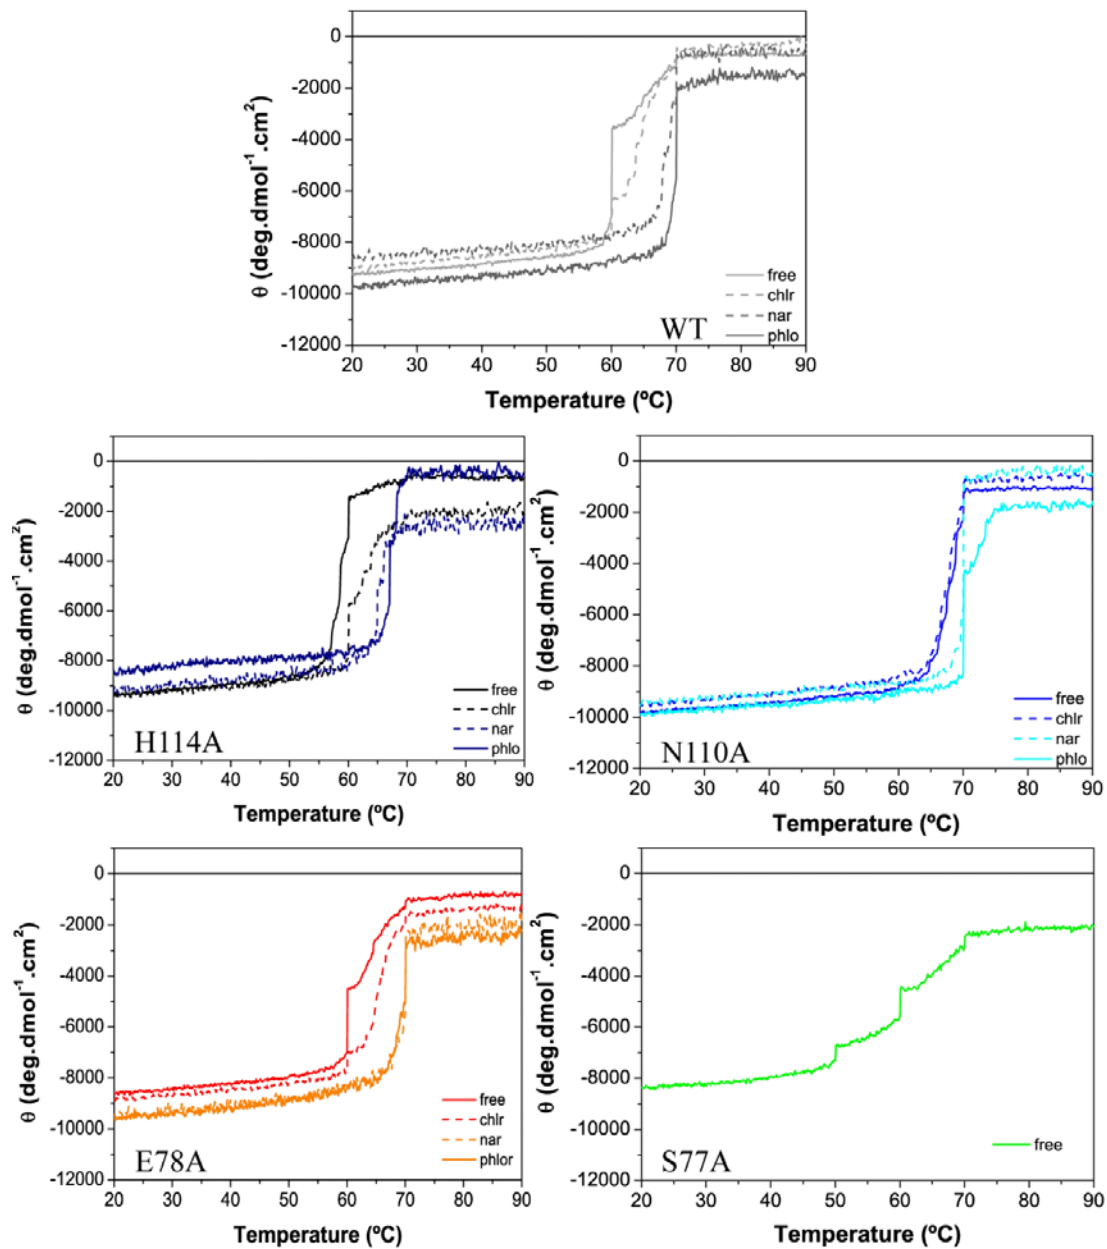

*SI\_Figure: Protein unfolding of TtgR WT and mutants in the presence of ligands monitored by CD ellipticity at 222 nm*
